# Supplementary material for: Unexpected coordination difference in geometric-isomerism between N,S- and N,N-heterocyclic carbenes in cyclometallated platinum(ii)
Source: Royal Society of Chemistry journal article supplement (doi:10.1039/b914036k), 2009-01-01
Supplement: b914036k.pdf [file b914036k.pdf]

## Unexpected Coordination Difference in Geometric-Isomerism Between *N,S*- and *N,N*-Heterocyclic Carbenes in Cyclometallated Platinum(II)

Swee Kuan Yen<sup>a</sup>, David J. Young<sup>b</sup>, Han Vinh Huynh<sup>a</sup>, Lip Lin Koh<sup>a</sup> and T. S. Andy Hor<sup>a\*</sup>

**General Procedures.** Unless otherwise stated, all manipulations were performed without taking precautions to exclude air and moisture. All solvents were used as received. Benzothiazole and 2-phenylpyridine was purchased from Sigma-Aldrich® and distilled prior to use. [Pt(C<sup>^</sup>N)(acac)]<sup>1</sup> and 1,3-dibenzylbenzimidazolium bromide<sup>2</sup> were prepared as reported. <sup>1</sup>H and <sup>13</sup>C NMR spectra were recorded on a Bruker AC 300 and / or AMX 500 spectrometer using Me<sub>4</sub>Si as an internal standard. <sup>195</sup>Pt NMR spectra were recorded on a Bruker AMX 500 spectrometer using 1.2 M K<sub>2</sub>PtCl<sub>4</sub> in D<sub>2</sub>O as an external standard referenced to -1620 ppm.<sup>3</sup> ESI mass spectra were obtained using a Finnigan MAT 731 LCQ spectrometer. Elemental analyses were performed on a Perkin-Elmer PE 2400 elemental analyzer at the Department of Chemistry, National University of Singapore.

### [Pt(C<sup>^</sup>N)(*N*-benzylbenzothiazolin-2-ylidene)(Br)] (1)

A mixture of 3-benzylbenzothiazolium bromide (0.79 g, 0.26 mmol) and Pt(C<sup>^</sup>N)(acac) (0.11 g, 0.24 mmol) was suspended in DMSO (5 mL) and heated at 70 °C overnight. The solvent was removed under vacuum. Purification by column chromatography using CH<sub>2</sub>Cl<sub>2</sub> as eluent gave **1** as a yellow solid. Yellow single crystals of **1** were obtained from a diffusion of Et<sub>2</sub>O into a concentrated CH<sub>2</sub>Cl<sub>2</sub> solution. Yield: 0.05 g (0.077 mmol, 32%). <sup>1</sup>H NMR (300 MHz, CDCl<sub>3</sub>): δ 9.85 (d, <sup>3</sup>J<sub>HH</sub> = 5.3 Hz, 1H, Ar-H), 7.98-6.93 (m, 15H, Ar-H), 6.64 (d, <sup>3</sup>J<sub>HH</sub> = 7.6 Hz, 1H, Ar-H), 6.47 (d, <sup>2</sup>J<sub>HH</sub> = 15.3 Hz, 1H, CH<sub>2</sub>), 6.20 (d, <sup>2</sup>J<sub>HH</sub> = 15.3 Hz, 1H, CH<sub>2</sub>). <sup>13</sup>C{<sup>1</sup>H} NMR (125 MHz, CDCl<sub>3</sub>): δ 197.5 (s, NSHC), 165.2, 150.9, 144.8, 143.9, 143.3, 138.9, 135.9, 134.3, 133.8, 130.6, 128.9, 128.2, 127.5, 126.7, 124.9, 123.9, 123.8, 122.6, 122.1, 119.2, 118.3, 115.2 (s, Ar-C), 59.5 (s, CH<sub>2</sub>). <sup>195</sup>Pt{<sup>1</sup>H} NMR (107 MHz, CDCl<sub>3</sub>): δ - 3578. MS (ESI, positive mode) m/z (%): 575 [M-

Br]<sup>+</sup>. Anal. Calc for C<sub>25</sub>H<sub>19</sub>BrN<sub>2</sub>PtS (M = 654.48): C, 45.88; H, 2.93; N, 4.28; S, 4.90. Found: C, 46.20; H, 3.08; N, 4.13; S, 4.72.

### [Pt(C<sup>^</sup>N)(*N*-propylbenzothiazolin-2-ylidene)(Br)] (2)

Complex **2** was prepared as described above for **1** from 3-propylbenzothiazolium bromide (0.08 g, 0.29 mmol) and Pt(C<sup>^</sup>N)(acac) (0.12 g, 0.26 mmol). Yellow single crystals of **2** were obtained from a diffusion of Et<sub>2</sub>O into a concentrated CH<sub>2</sub>Cl<sub>2</sub> solution. Yield: 0.06 g (0.099 mmol, 38%). <sup>1</sup>H NMR (500 MHz, CDCl<sub>3</sub>): δ 9.80 (d, <sup>3</sup>J<sub>HH</sub> = 5.7 Hz, J<sub>PtH</sub> = ca 22 Hz, 1H, Ar-H), 7.84 (d, <sup>3</sup>J<sub>HH</sub> = 8.9 Hz, 2H, Ar-H), 7.75 (m, 1H, Ar-H), 7.69 (d, <sup>3</sup>J<sub>HH</sub> = 8.2 Hz, 1H, Ar-H), 7.58-7.49 (m, 3H, Ar-H), 7.27 (t, <sup>3</sup>J<sub>HH</sub> = 6.9 Hz, 1H, Ar-H), 7.10 (t, <sup>3</sup>J<sub>HH</sub> = 8.2 Hz, 1H, Ar-H), 6.90 (t, <sup>3</sup>J<sub>HH</sub> = 8.2 Hz, 1H, Ar-H), 6.45 (d, <sup>3</sup>J<sub>HH</sub> = 7.6 Hz, 1H, Ar-H), 4.97 (m, 1H, CHHCH<sub>2</sub>CH<sub>3</sub>), 4.85 (m, 1H, CHHCH<sub>2</sub>CH<sub>3</sub>), 2.23 (m, 1H, CH<sub>2</sub>CHHCH<sub>3</sub>), 2.07 (m, 1H, CH<sub>2</sub>CHHCH<sub>3</sub>), 1.02 (t, <sup>3</sup>J<sub>HH</sub> = 7.3 Hz, 3H, CH<sub>2</sub>CH<sub>2</sub>CH<sub>3</sub>). <sup>13</sup>C{<sup>1</sup>H} NMR (125 MHz, CDCl<sub>3</sub>): δ 195.3 (s, NSHC), 165.1, 150.8, 144.8, 143.9, 143.4, 138.9, 135.8, 134.3, 130.2, 128.9, 128.8, 126.7, 124.9, 123.8, 123.1, 118.3, 114.0 (s, Ar-C), 56.2 (s, CH<sub>2</sub>CH<sub>2</sub>CH<sub>3</sub>), 22.7 (s, CH<sub>2</sub>CH<sub>2</sub>CH<sub>3</sub>), 14.1 (s, CH<sub>2</sub>CH<sub>2</sub>CH<sub>3</sub>). <sup>195</sup>Pt{<sup>1</sup>H} NMR (107 MHz, CDCl<sub>3</sub>): δ - 3581. MS (ESI, positive mode) m/z (%): 527 [M-Br]<sup>+</sup>. Anal. Calc for C<sub>21</sub>H<sub>19</sub>BrN<sub>2</sub>PtS.2Et<sub>2</sub>O (M = 754.68): C, 46.15; H, 5.21; N, 3.71; S, 4.25. Found: C, 45.20; H, 4.16; N, 3.98; S, 2.70.

### [Pt(C<sup>^</sup>N)(*N,N*-dibenzylbenzimidazol-2-ylidene)(Br)] (3)

Complex **3** was prepared as described above as described above for **1** from dibenzylbenzimidazolium bromide (0.17 g, 0.44 mmol) and Pt(C<sup>^</sup>N)(acac) (0.16 g, 0.37 mmol). A 20 : 1 mixture of isomers was observed in the <sup>1</sup>H NMR spectrum. Yellow single crystals of **3** were obtained from a diffusion of Et<sub>2</sub>O into a concentrated CH<sub>2</sub>Cl<sub>2</sub> solution. Yield: 0.15 g (0.20 mmol, 54%). <sup>1</sup>H NMR of major isomer (300 MHz, CDCl<sub>3</sub>): δ 8.47 (d, <sup>3</sup>J<sub>HH</sub> = 6.9 Hz, J<sub>PtH</sub> = 25 Hz, 1H, Ar-H), 7.70-7.62 (m, 2H, Ar-H), 7.51 (d, <sup>3</sup>J<sub>HH</sub> = 7.4 Hz, 1H, Ar-H), 7.46-7.11 (m, 17H, Ar-H), 6.36 (t, <sup>3</sup>J<sub>HH</sub> = 7.31 Hz, 1H, Ar-H), 6.14 (d, <sup>2</sup>J<sub>HH</sub> = 15.3 Hz, 2H, CH<sub>2</sub>), 5.95 (d, <sup>2</sup>J<sub>HH</sub> = 15.3 Hz, 2H, CH<sub>2</sub>). <sup>13</sup>C{<sup>1</sup>H} NMR (75 MHz, CDCl<sub>3</sub>): δ 193.7 (s, NHC), 169.2 (s, J<sub>Pt-C</sub> = 34.9 Hz, Ar-H), 158.2 (s, Ar-C), 150.8 (s, J<sub>Pt-C</sub> = 18.0 Hz, Ar-C), 145.9, 137.1, 135.7, 135.5, 134.9 (s, Ar-C), 130.5 (s, J<sub>Pt-C</sub> = 16.4 Hz, Ar-C), 128.4,

127.9, 127.8, 123.8, 123.3, 123.0 (s, Ar-C), 121.9 (s,  $J_{\text{Pt-C}} = 22.4$  Hz, Ar-C), 118.9 (s,  $J_{\text{Pt-C}} = 22.4$  Hz, Ar-C), 111.5 (Ar-C), 51.7 (s,  $J_{\text{Pt-C}} = 8.73$  Hz, CH<sub>2</sub>). <sup>195</sup>Pt{<sup>1</sup>H} NMR (107 MHz, CDCl<sub>3</sub>): δ - 3584. MS (ESI, positive mode) m/z (%): 648 [M-Br]<sup>+</sup>. Anal. Calc for C<sub>32</sub>H<sub>26</sub>BrN<sub>3</sub>Pt.H<sub>2</sub>O (M = 745.57): C, 51.55; H, 3.79; N, 5.64. Found: C, 50.21; H, 3.97; N, 4.89.

### X-ray Diffraction Studies

Single crystals of complexes **1-3** were obtained by diffusion of Et<sub>2</sub>O into CH<sub>2</sub>Cl<sub>2</sub> solution. Suitable crystals were mounted on quartz fibers and X-ray data collected on a Bruker AXS APEX diffractometer, equipped with a CCD detector, using graphite-monochromated MoKα radiation ( $\lambda = 0.71073$  Å). The collecting frames of date, indexing reflection and determination of lattice parameters and polarization effects were performed with the SMART suite programs.<sup>4</sup> The integration of intensity of reflections and scaling was performed by SAINT. The empirical absorption correction was performed by SADABS.<sup>5</sup> The space group determination, structure solution and least-squares refinements on  $|F|^2$  were carried out with the SHELXTL.<sup>6</sup> The structures were solved by direct methods to locate the heavy atoms, followed by difference maps for the light non-hydrogen atoms. The crystal of **3** contains two independent molecules in the asymmetric unit cell. Anisotropic thermal parameters were refined for the rest of the non-hydrogen atoms. The hydrogen atoms were placed in their ideal positions. A selected summary of crystal data for complexes **1-3** are summarized in Tables 1.

Table 1: Selected bond lengths [Å] and angles [deg] of **1-3**.

| Bond Lengths | <b>1</b> | <b>2</b> | <b>3</b> |
|--------------|----------|----------|----------|
|--------------|----------|----------|----------|

| [Å]                 | <b>Molecule a</b> |            |            | <b>Molecule b</b> |            |
|---------------------|-------------------|------------|------------|-------------------|------------|
| Pt1-C1              | 1.939(4)          | 1.946(4)   | 2.053(7)   | Pt2-C33           | 2.035(8)   |
| Pt1-N2              | 2.074(4)          | 2.080(3)   | -          | -                 | -          |
| Pt1-N3              | -                 | -          | 2.022(6)   | Pt2-N6            | 2.024(6)   |
| Pt1-C21             | 2.000(4)          | 1.985(4)   | -          | -                 | -          |
| Pt1-C32             | -                 | -          | 2.037(6)   | Pt2-C64           | 2.025(8)   |
| Pt1-Br1             | 2.521(5)          | 2.525(5)   | 2.443(9)   | Pt2-Br4           | 2.437(9)   |
| S1-C1               | 1.722(4)          | 1.725(4)   | -          | -                 | -          |
| S1-C7               | 1.736(5)          | 1.747(4)   | -          | -                 | -          |
| N1-C1               | 1.346(5)          | 1.340(5)   | 1.377(8)   | N4-C33            | 1.346(8)   |
| N1-C2               | 1.403(5)          | 1.401(5)   | 1.391(9)   | N4-C34            | 1.402(10)  |
| N1-C8               | 1.480(5)          | 1.471(5)   | 1.444(9)   | N4-C40            | 1.470(9)   |
| N2-C1               | -                 | -          | 1.344(9)   | N5-C33            | 1.351(9)   |
| N2-C7               | -                 | -          | 1.411(8)   | N5-C39            | 1.396(9)   |
| <b>Angles [deg]</b> |                   |            |            |                   |            |
| C1-Pt1-C21          | 93.71(16)         | 93.29(17)  | -          | -                 | -          |
| C1-Pt1-C32          | -                 | -          | 178.2(3)   | C33-Pt2-C64       | 175.9(3)   |
| C1-Pt1-N2           | 174.76(14)        | 170.87(15) | -          | -                 | -          |
| C1-Pt1-N3           | -                 | -          | 98.1(2)    | C33-Pt2-N6        | 96.2(3)    |
| C21-Pt1-N2          | 81.08(15)         | 80.85(16)  | -          | -                 | -          |
| C32-Pt1-N3          | -                 | -          | 80.7(3)    | C64-Pt2-N6        | 80.0(3)    |
| C1-Pt1-Br1          | 89.58(11)         | 90.02(12)  | 86.86(19)  | C33-Pt2-Br4       | 88.03(19)  |
| C21-Pt1-Br1         | 176.65(11)        | 173.56(11) | -          | -                 | -          |
| C32-Pt1-Br1         | -                 | -          | 94.2(2)    | C64-Pt2-Br4       | 95.7(2)    |
| N2-Pt1-Br1          | 95.62(9)          | 96.51(11)  | -          | -                 | -          |
| N3-Pt1-Br1          | -                 | -          | 173.60(16) | N6-Pt2-Br4        | 175.41(19) |
| C1-N1-C8            | 122.5(4)          | 121.2(3)   | 126.2(6)   | C33-N4-C40        | 123.4(7)   |
| C11-N2-C15          | 118.4(4)          | 118.8(4)   | -          | -                 | -          |
| C22-N3-C26          | -                 | -          | 119.2(6)   | C54-N6-C58        | 118.5(7)   |
| C11-N2-Pt1          | 127.2(3)          | 125.9(3)   | -          | -                 | -          |
| C22-N3-Pt1          | -                 | -          | 125.3(5)   | C54-N6-Pt2        | 124.0(6)   |
| C15-N2-Pt1          | 114.3(3)          | 114.4(3)   | -          | -                 | -          |
| C26-N3-Pt1          | -                 | -          | 115.4(5)   | C58-N6-Pt2        | 117.3(5)   |
| N1-C1-S1            | 109.2(3)          | 109.7(3)   | -          | -                 | -          |
| N1-C1-N2            | -                 | -          | 106.8(6)   | N4-C33-N5         | 104.8(7)   |
| N1-C1-Pt1           | 128.8(3)          | 126.6(3)   | 125.5(5)   | N4-C33-Pt2        | 128.8(6)   |
| S1-C1-Pt1           | 121.9(2)          | 123.7(2)   | -          | -                 | -          |
| N2-C1-Pt1           | -                 | -          | 127.4(5)   | N5-C33-Pt2        | 126.3(5)   |

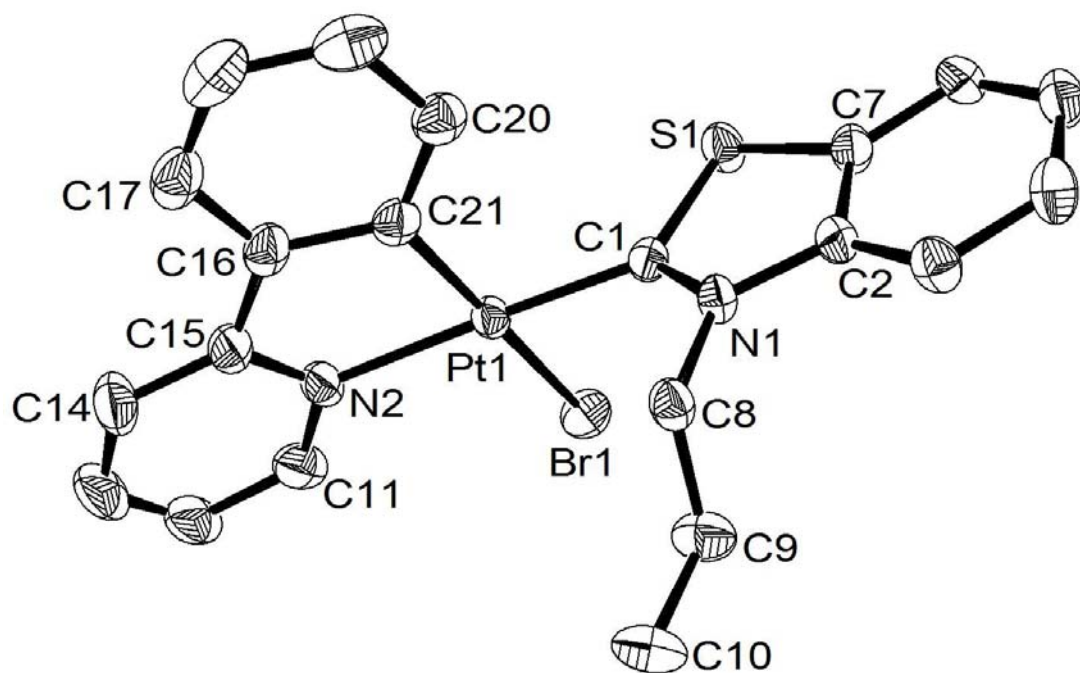

**Fig. S1.** ORTEP representation of **2** with 50% thermal ellipsoids and labeling scheme; hydrogen atoms are omitted for clarity.

## References

- 1 B. Yin, F. Niemeyer, J. A. G. Williams, J. Jiang, A. Boucekkine, L. Toupet, H. L. Bozec, V. Guerschais, *Inor. Chem.*, 2006, 45, 8584.
- 2 H. V. Huynh, L. R. Wong, P. S. Ng *Organometallics* 2008, 27, 2231.
- 3 B. M. Still, P. G. A. Kumar, J. R. Aldrich-Wright, W. S. Price, *Chem. Soc. Rev.*, 2007, 665.
- 4 SMART (Version 5.631) and SAINT (Version 6.63) Software Reference Manuals, Bruker AXS GmbH, Karlsruhe, Germany, 2000.
- 5 G. M. Sheldrick, SADABS: A Software for Empirical Absorption Correction, University of Göttingen, Göttingen, Germany, 2001.
- 6 SHELXTL Reference Manual, Version 6.10, Bruker AXS GmbH, Karlsruhe, WI, 2000.
